# Supplementary material for: Running out of lithium? A route to differentiate between capacity losses and active lithium losses in lithium-ion batteries
Source: Royal Society of Chemistry journal article supplement (doi:10.1039/c7cp05405j), 2017-01-01
Supplement: c7cp05405j1.pdf [file c7cp05405j1.pdf]

## Supporting Information

### Running out of Lithium?

#### A Route to Differentiate between Capacity Losses and Active Lithium

#### Losses in Lithium-Ion Batteries

Florian Holtstiege<sup>a</sup>, Andrea Wilken<sup>a</sup>, Martin Winter<sup>a,b</sup>, Tobias Placke<sup>a</sup>

<sup>a</sup> University of Münster, MEET Battery Research Center, Institute of Physical Chemistry,  
Corrensstraße 46, 48149 Münster, Germany

<sup>b</sup> Helmholtz Institute Münster, IEK-12, Forschungszentrum Jülich,  
Corrensstraße 46, 48149 Münster, Germany

**Table S1.** Lithium, iron and phosphorus stoichiometry of pristine LFP electrodes, measured by ICP-OES and normalized to the iron content. SD: standard deviation; RSD: relative standard deviation.

|                                   | <b>Li</b> | <b>Fe</b> | <b>P</b> |
|-----------------------------------|-----------|-----------|----------|
| <b>LFP electrodes<br/>(fresh)</b> | 1.112     | 1         | 1.110    |
|                                   | 1.121     | 1         | 1.116    |
|                                   | 1.121     | 1         | 1.107    |
|                                   | 1.140     | 1         | 1.103    |
|                                   | 1.155     | 1         | 1.117    |
| <b>Arithmetic mean</b>            | 1.130     | 1         | 1.111    |
| <b>SD</b>                         | 0.015     | -         | 0.005    |
| <b>RSD / %</b>                    | 1.4       | -         | 0.5      |

**Table S2.** Lithium, iron and phosphorus stoichiometry of LFP electrodes which were cycled for 103 cycles against graphite, measured by ICP-OES and normalized to iron and percentage of active lithium loss.

| <b>Cycled<br/>Cells</b> | <b>Li</b> | <b>Fe</b> | <b>P</b> | <b>Relative<br/>lithium loss<br/>(by ICP-OES)</b> | <b>Relative<br/>lithium loss<br/>(by AIC)</b> | <b><i>ICP-OES</i><br/><i>AIC</i></b> |
|-------------------------|-----------|-----------|----------|---------------------------------------------------|-----------------------------------------------|--------------------------------------|
| A                       | 1.053     | 1         | 1.155    | 6.8%                                              | 14.5%                                         | 47%                                  |
| B                       | 0.999     | 1         | 1.154    | 11.6%                                             | 20.4%                                         | 57%                                  |
| C                       | 1.029     | 1         | 1.153    | 8.9%                                              | 16.9%                                         | 53%                                  |
| D                       | 1.032     | 1         | 1.153    | 8.7%                                              | 16.2%                                         | 54%                                  |
| E                       | 1.024     | 1         | 1.151    | 9.3%                                              | 16.8%                                         | 56%                                  |
| <b>Range:</b>           |           |           |          |                                                   |                                               | <b>53% ± 3%</b>                      |

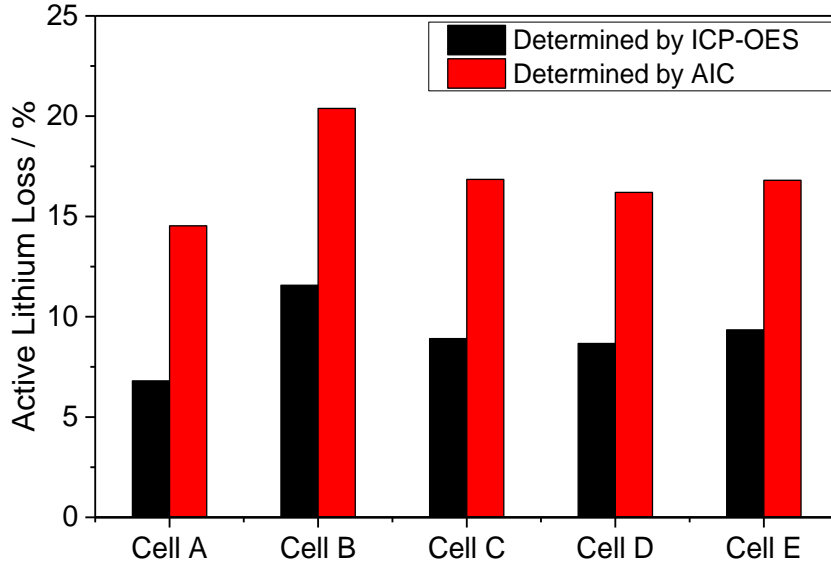

**Figure S1.** Comparison of active lithium loss after 103 cycles, determined by ICP-OES and accumulated irreversible capacity (AIC).

### Silicon/Graphite Composite

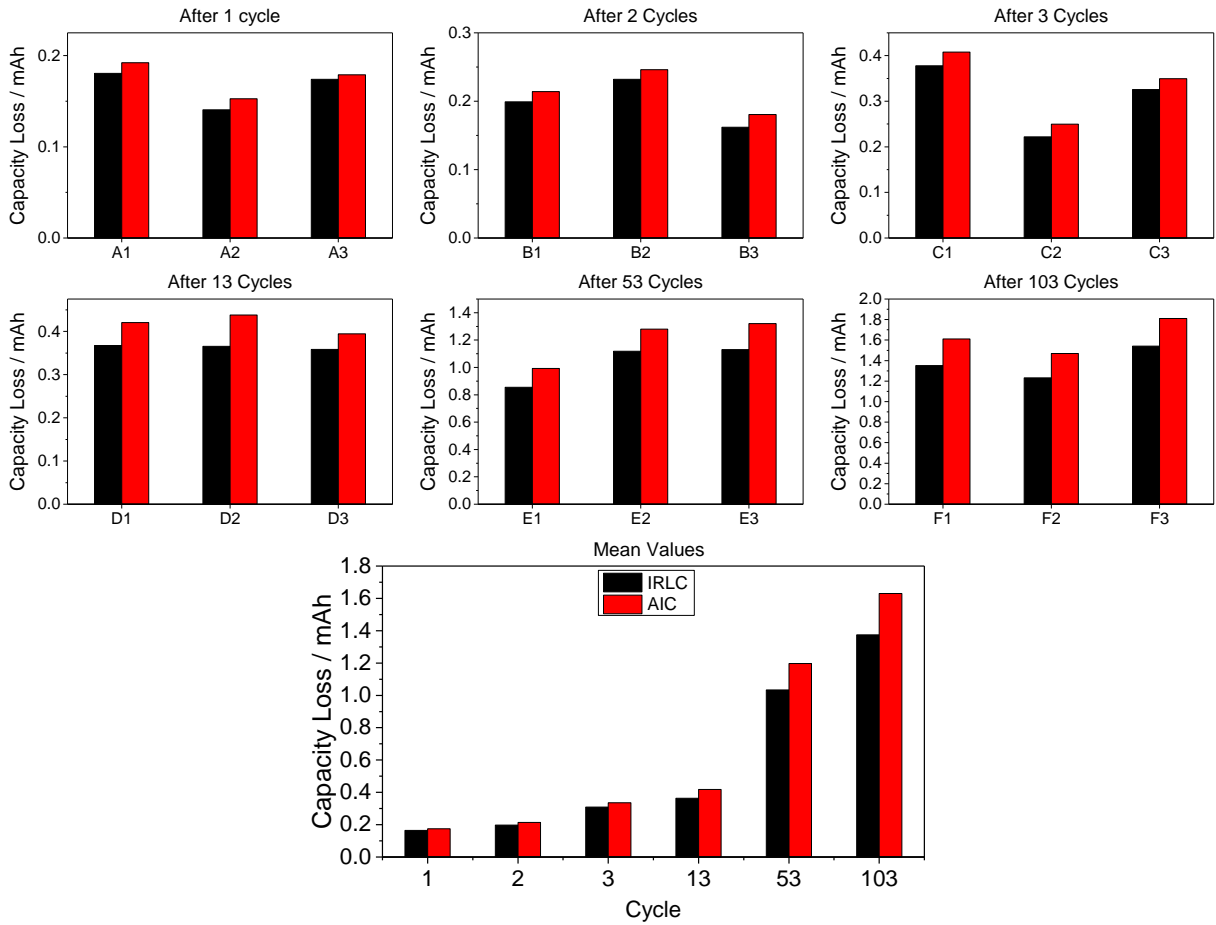

**Figure S2.** Capacity loss ( $Q_{ALL}$ ) determined by IRLC (red) and accumulated irreversible capacity ( $Q_{AIC}$ , black) after 1, 2, 3, 13, 53 and 103 cycles for three different cells. Standard cycling: Silicon-graphite composite as WE; LFP as CE; metallic lithium as RE; C-Rate: 1C; cut-off potentials: 0.02 V vs. Li/Li<sup>+</sup> and 1.5 vs. Li/Li<sup>+</sup>. Discharge against RE: C-Rate: C/30; cut-off voltage: 4.1 V.

## Carbon Spheres

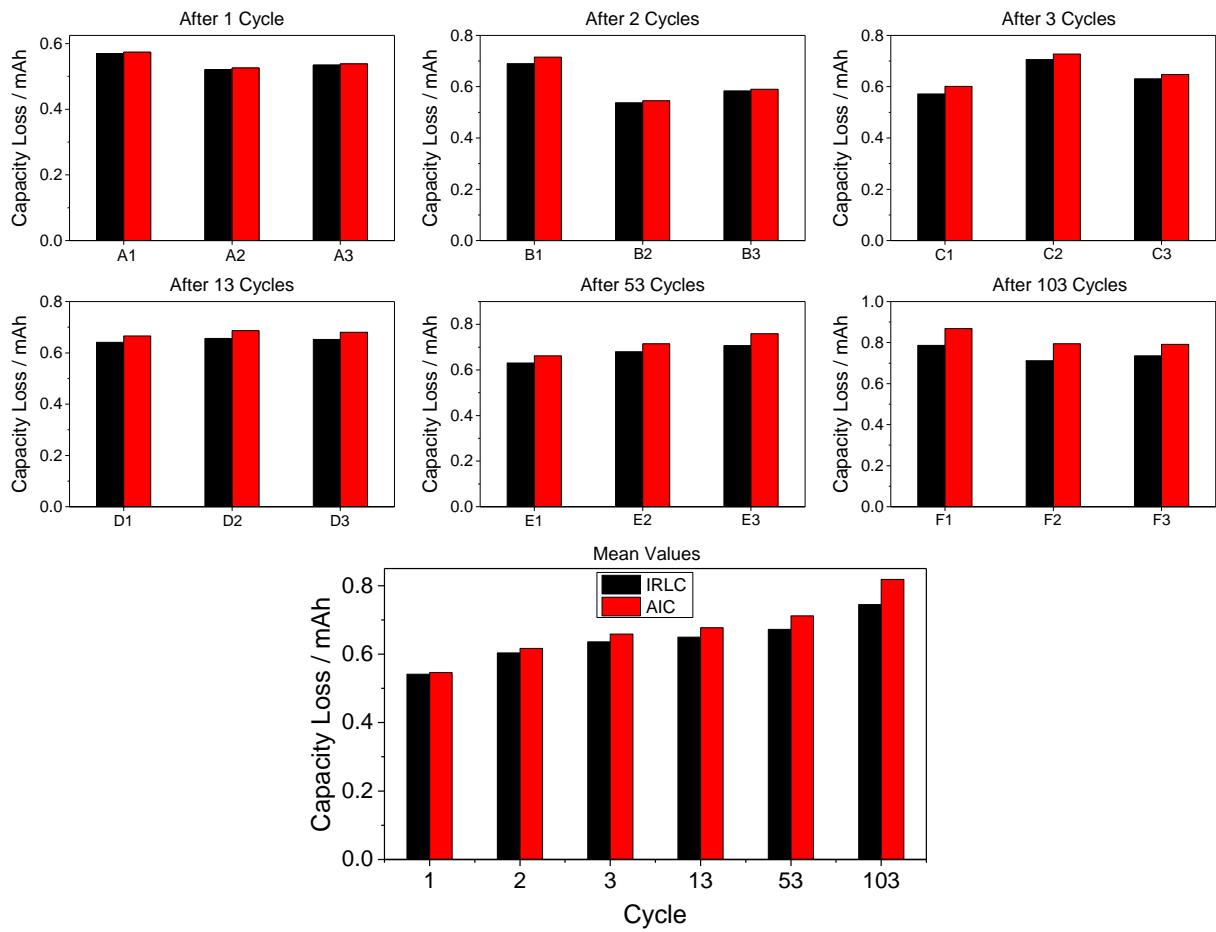

**Figure S3.** Capacity loss ( $Q_{ALL}$ ) determined by IRLC (red) and accumulated irreversible capacity ( $Q_{AIC}$ , black) after 1, 2, 3, 13, 53 and 103 cycles for three different cells named A, B and C. Standard cycling: Carbon sphere as WE; LFP as CE; metallic lithium as RE; C-Rate: 1C; cut-off potentials: 0.02 V vs. Li/Li<sup>+</sup> and 1.5 vs. Li/Li<sup>+</sup>. Discharge against RE: C-Rate: C/30; cut-off voltage: 4.1 V.

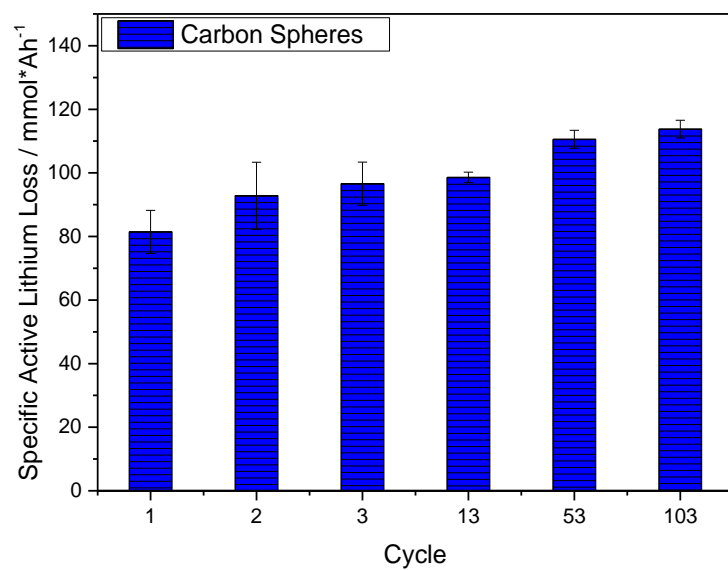

**Figure S4.** Average active lithium loss ( $n_{ALL}$ ) of carbon spheres with regard to the electrode capacity.

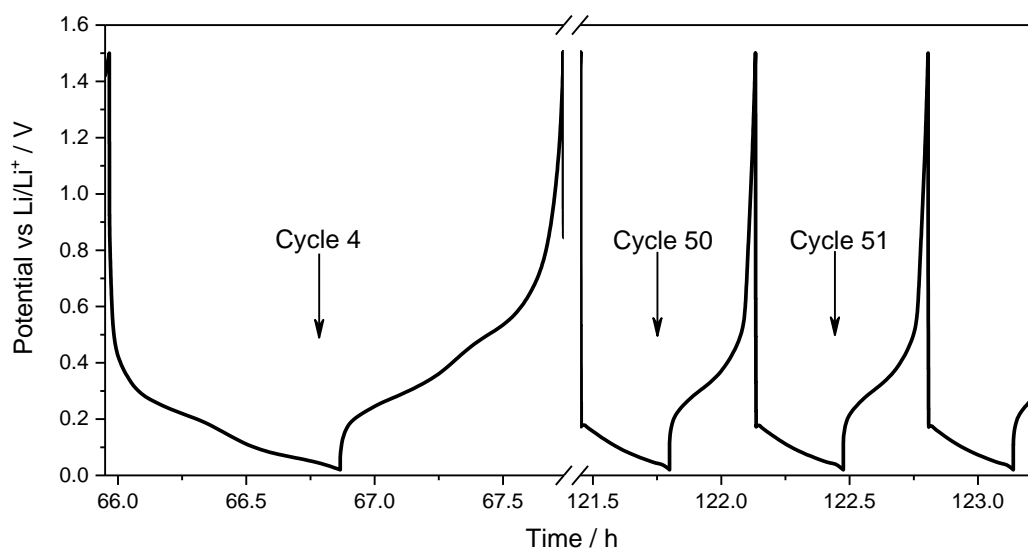

**Figure S5.** Potential profile of the silicon/graphite composite electrode showing cycle 5, 50 and 51. Silicon/graphite composite as WE; LFP as CE; metallic lithium as RE; C-Rate: 1C; cut-off potentials: 0.02 V and 1.5 vs. Li/Li<sup>+</sup>.
